# Supplementary material
Source: PubMed Central journal article supplement (PMC5629335)
Supplement: 729TableS1.pdf [file 729TableS1.pdf]

|    |                   |                                |    | eggs | larvae |   |
|----|-------------------|--------------------------------|----|------|--------|---|
| A  |                   | ♂G                             | x  | ♀A   | >2000  |   |
|    | F1                | ♂H <sub>G/A</sub>              | x  | ♀G   | 4021   | 0 |
|    |                   |                                |    | ♀A   | 2791   | 0 |
|    |                   | ♂A                             | x  | ♀G   | >2000  |   |
| F1 | ♂H <sub>A/G</sub> | x                              | ♀G | 4552 | 0      |   |
|    |                   |                                | ♀A | 3247 | 0      |   |
| B  |                   | ♂A <sup>Y2</sup>               | x  | ♀G   | >2000  |   |
|    | F1                | ♂H <sub>A<sup>Y2</sup>/G</sub> | x  | ♀G   | 5002   | 0 |
