# Supplementary material
Source: PubMed Central journal article supplement (PMC5629335)

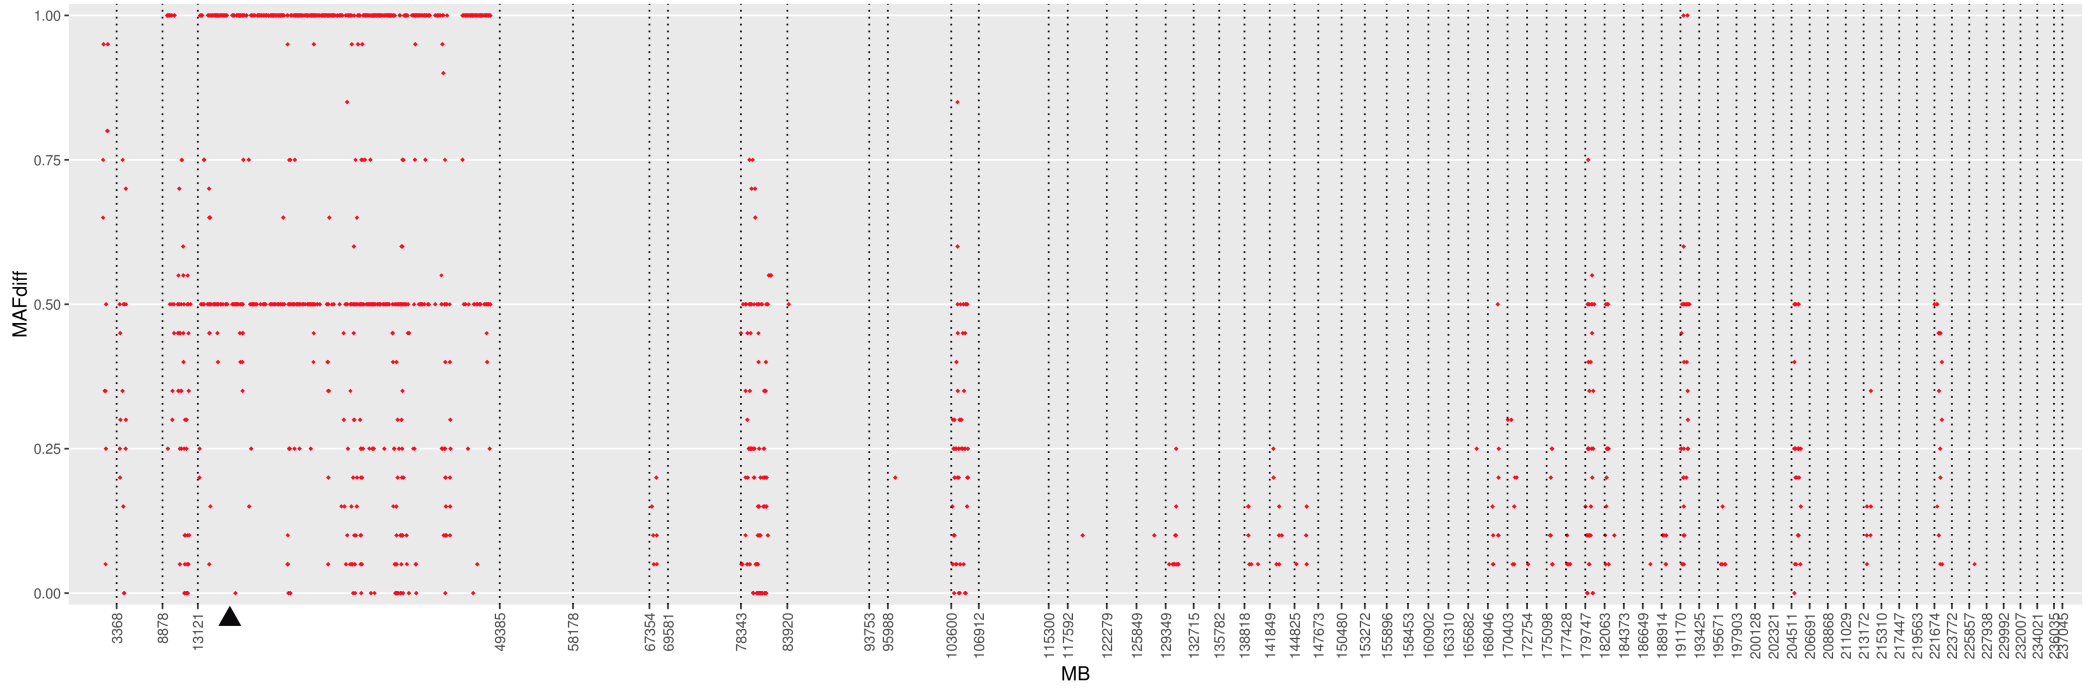

Supplement: 729FigureS1.pdf [file 729FigureS1.pdf]

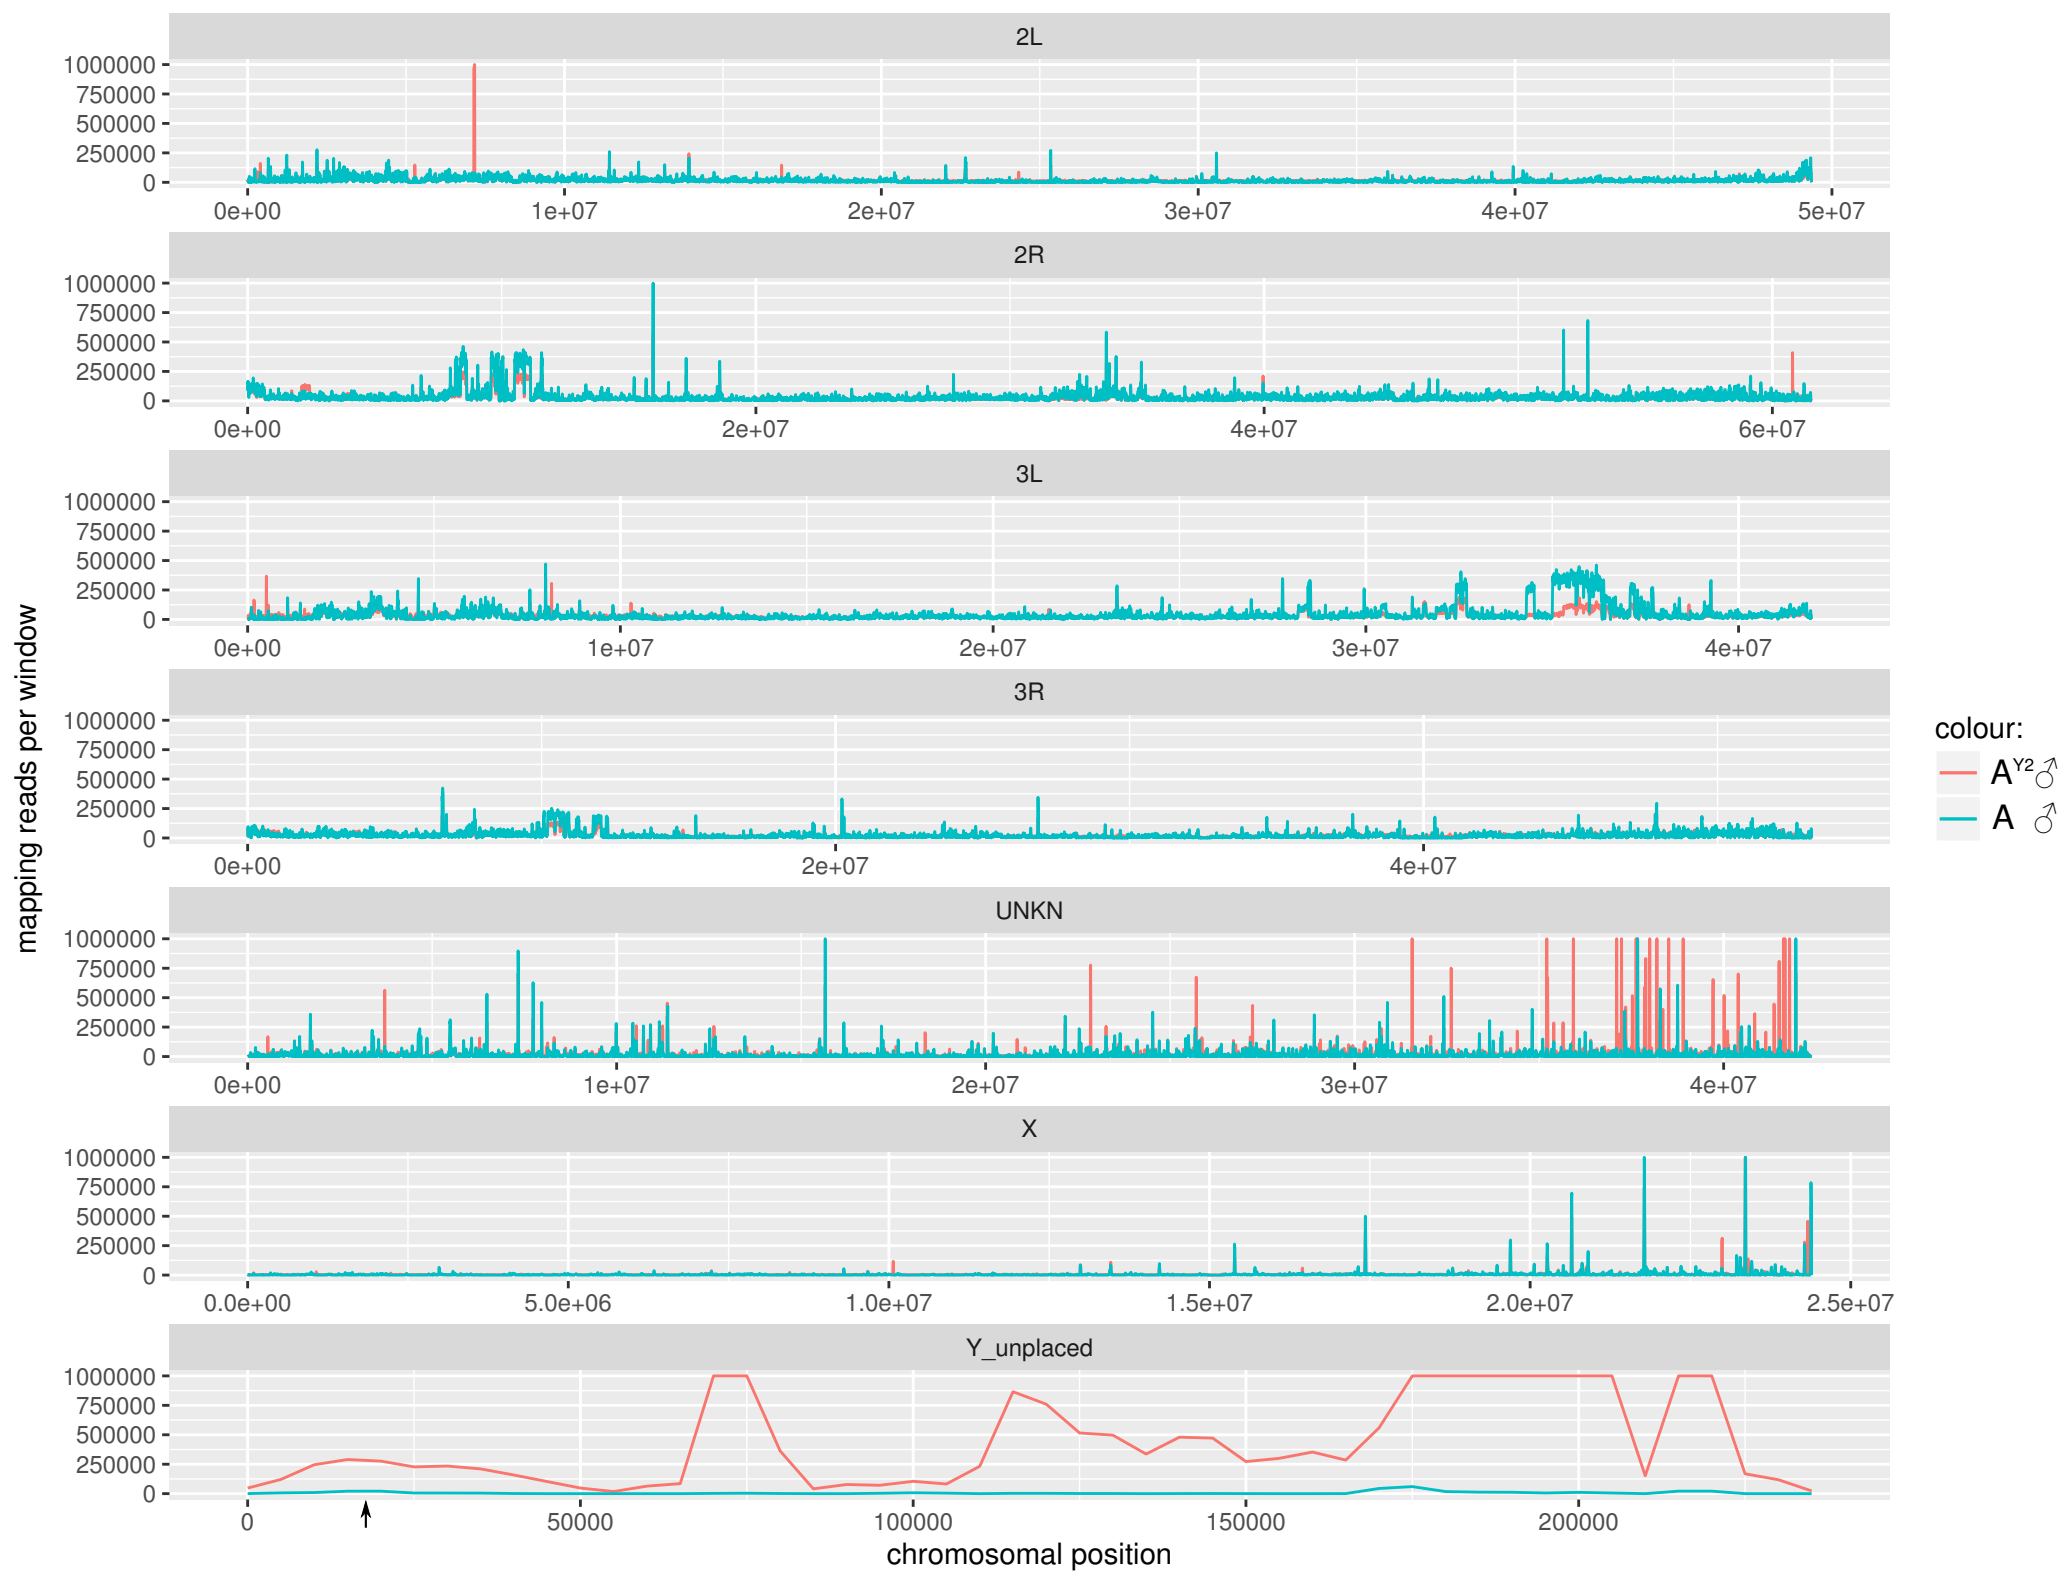

Supplement: 729FigureS2.pdf [file 729FigureS2.pdf]

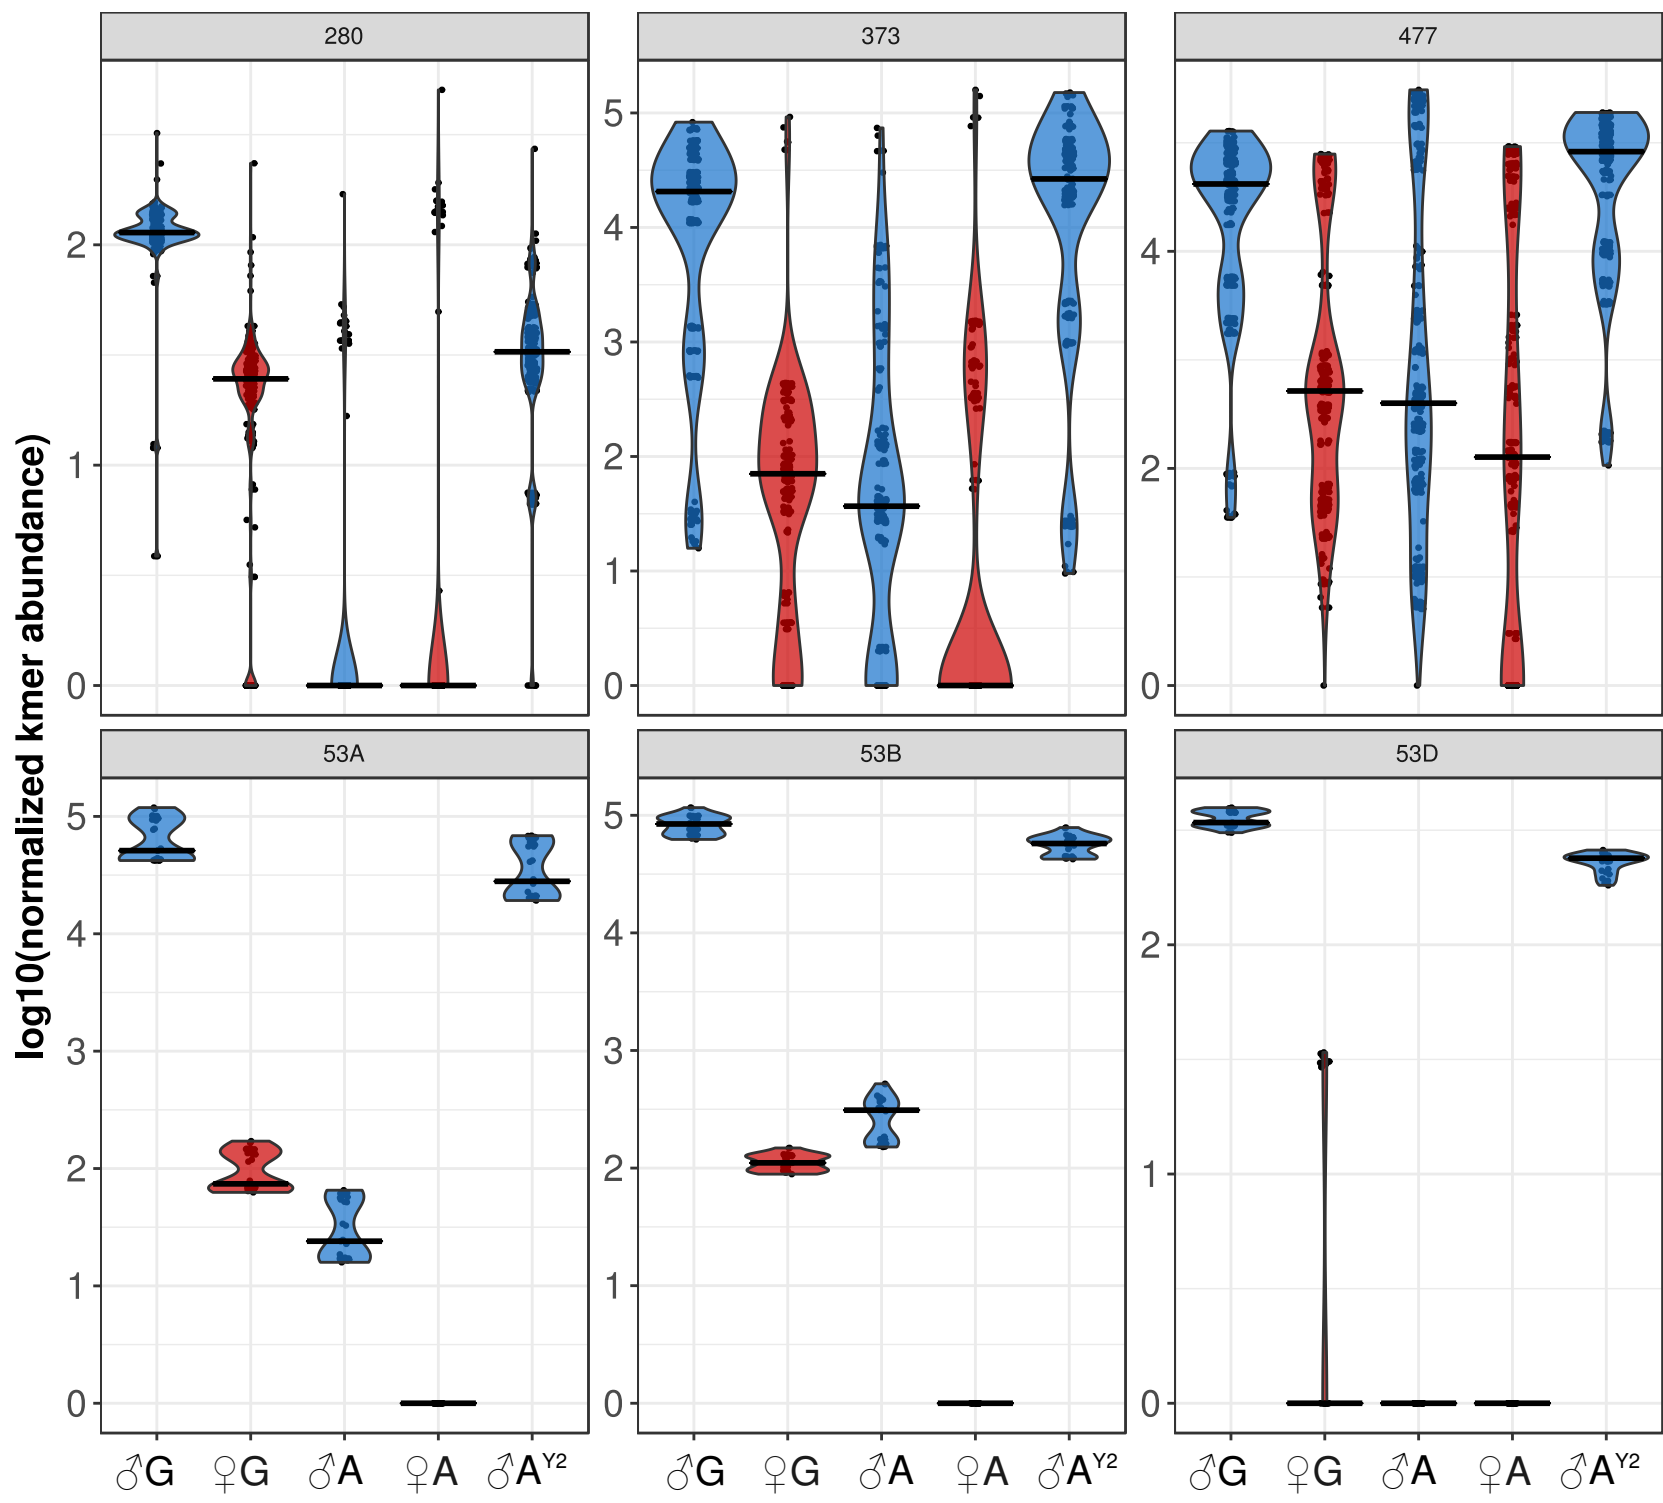

Supplement: 729FigureS3.pdf [file 729FigureS3.pdf]

# A

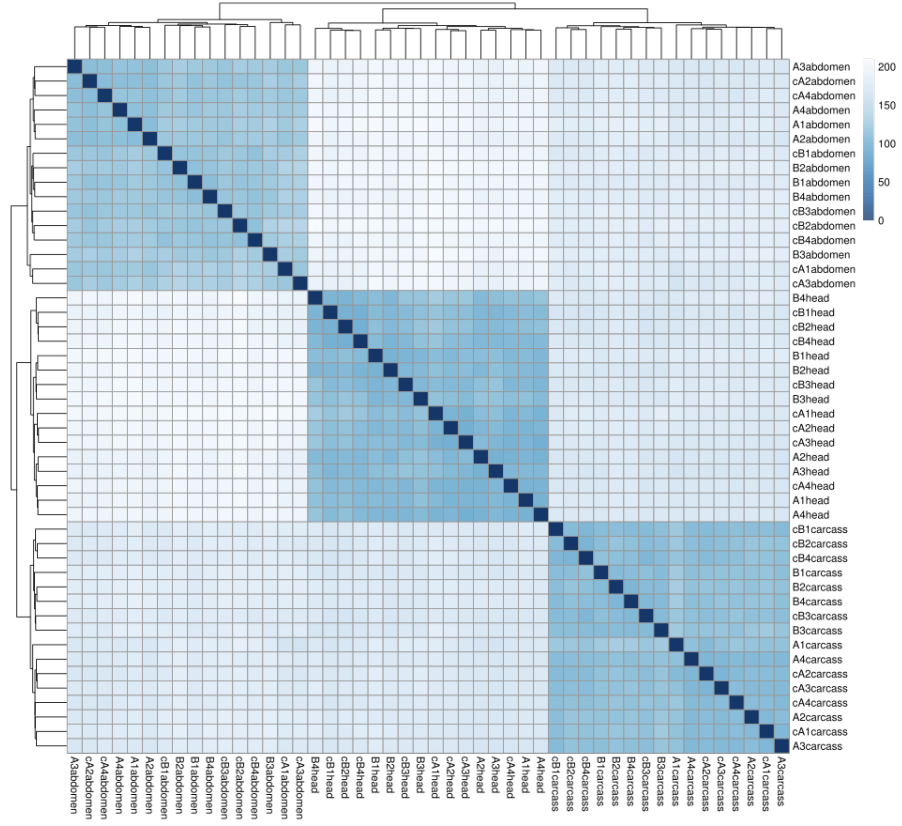

# B

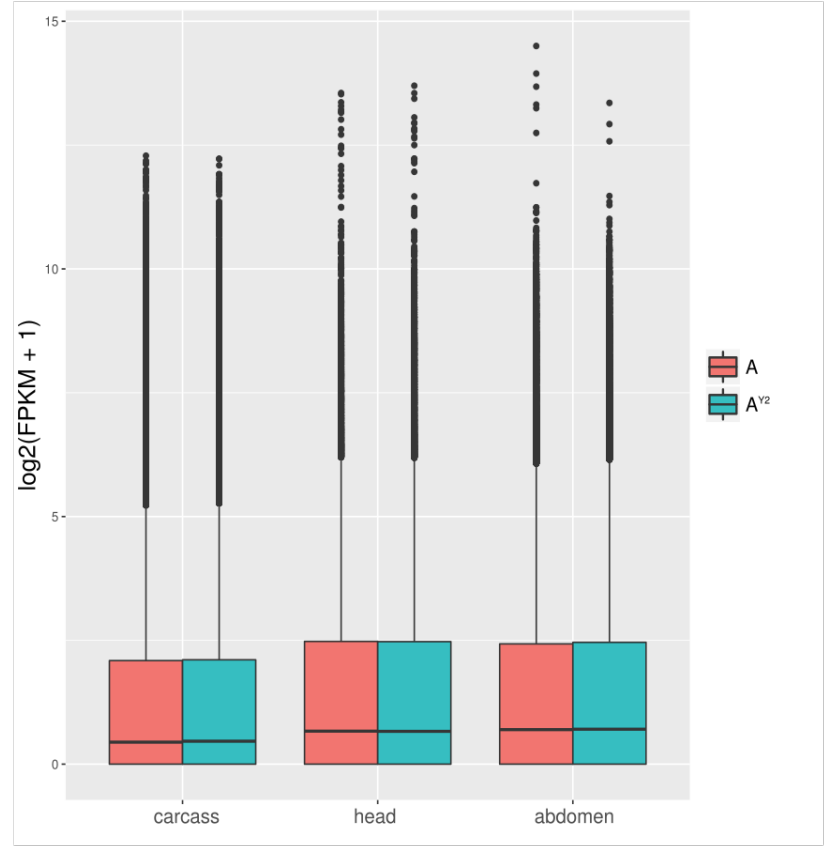

Supplement: 729FigureS4.pdf [file 729FigureS4.pdf]

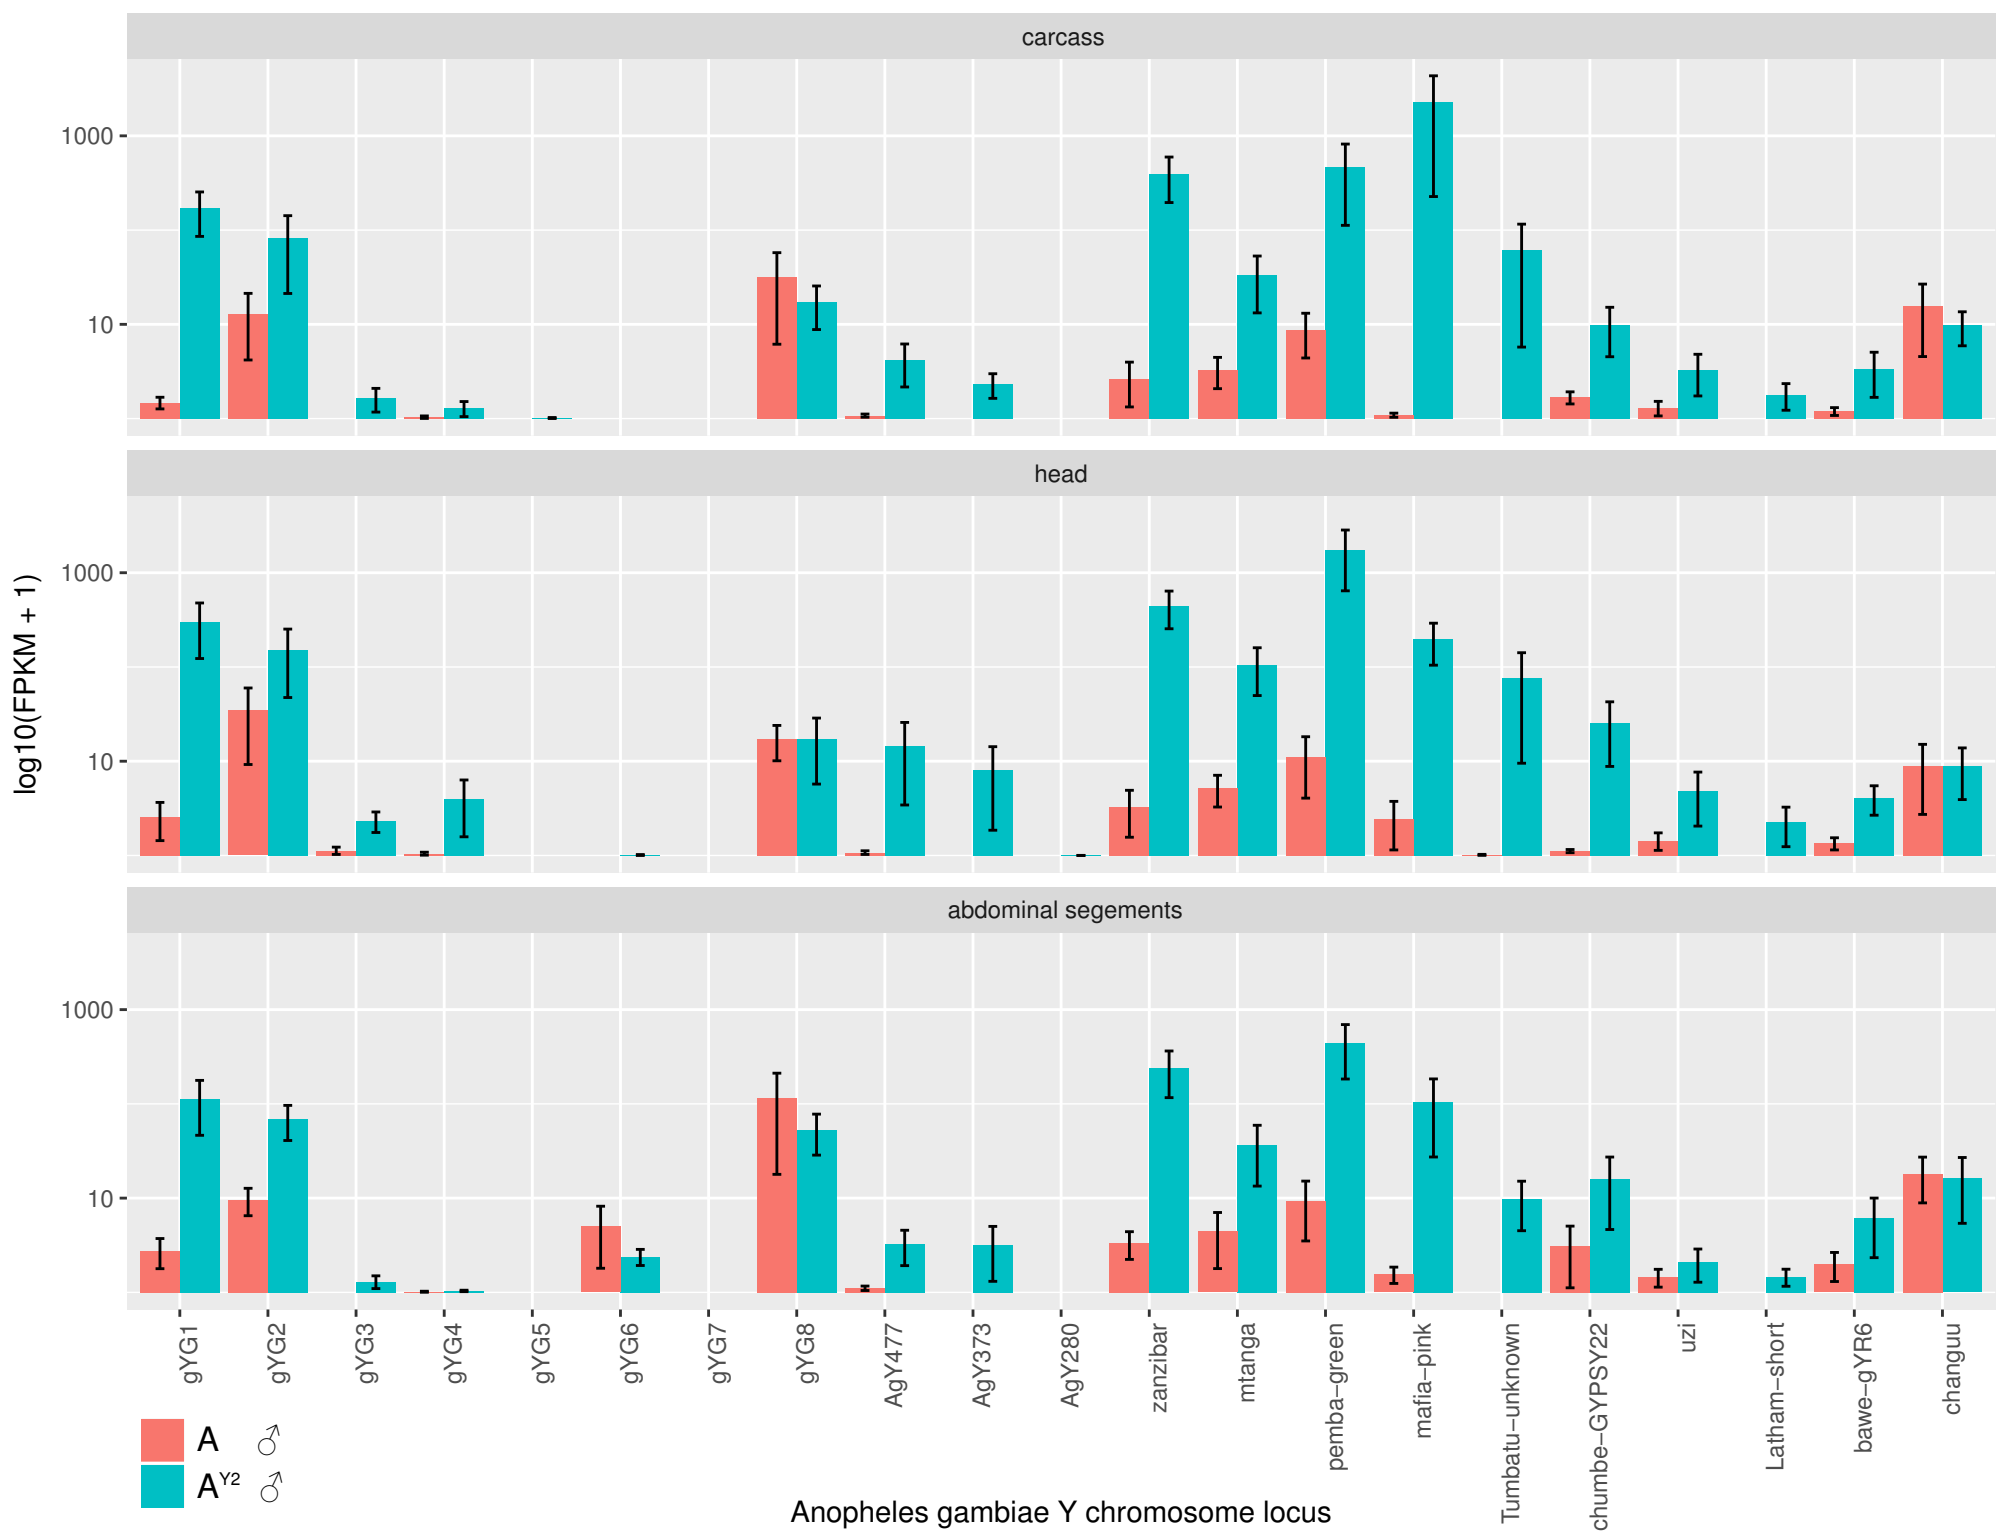

Supplement: 729FigureS5.pdf [file 729FigureS5.pdf]

**A**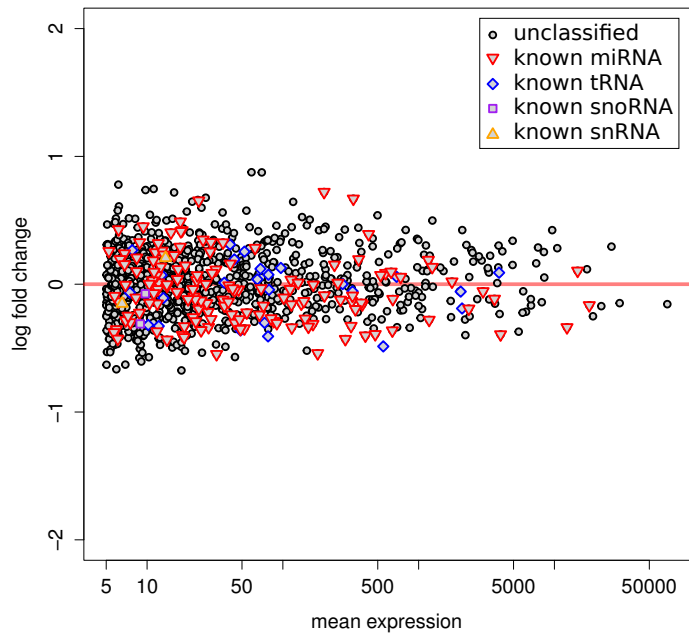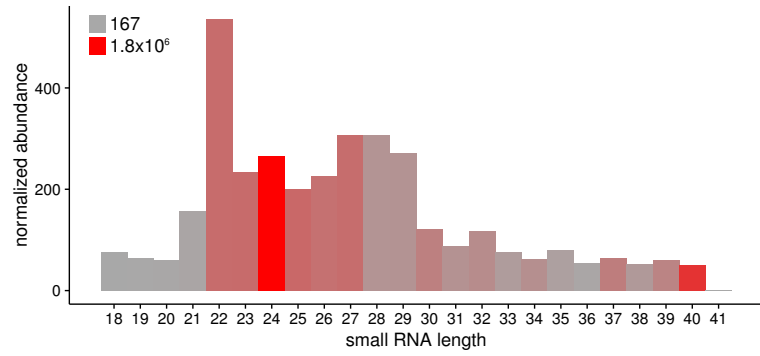**B**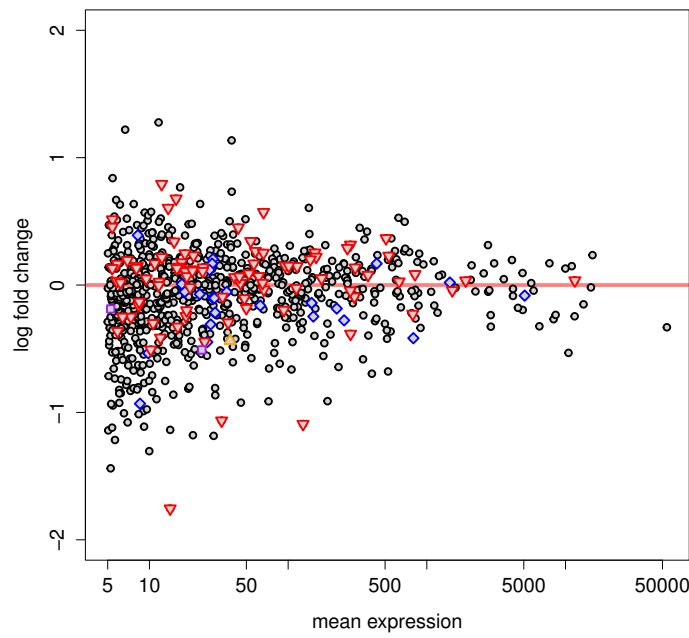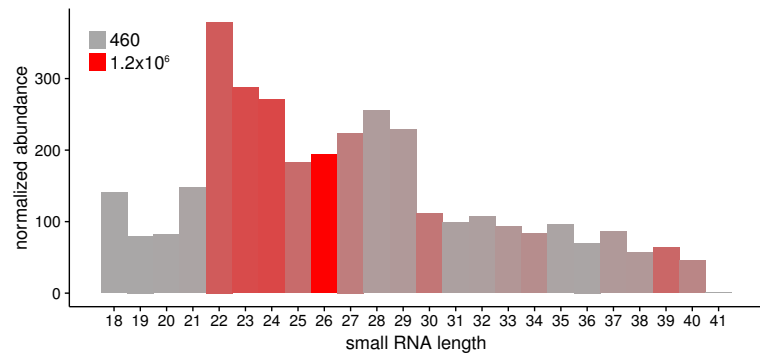**C**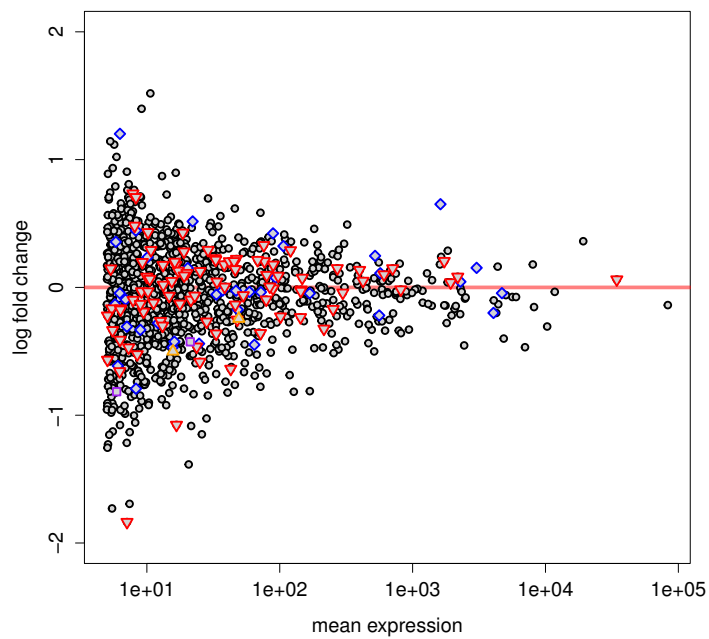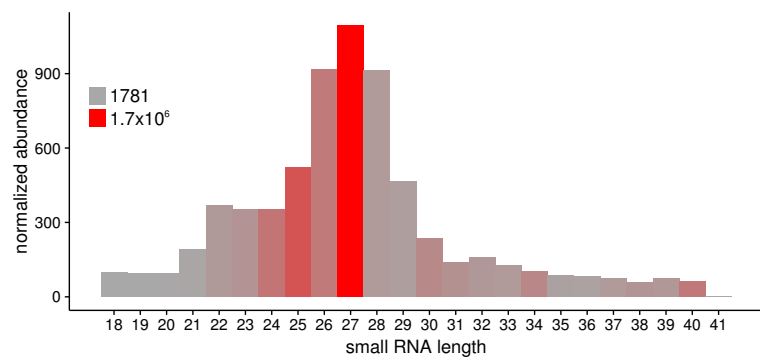

Supplement: 729FigureS6.pdf [file 729FigureS6.pdf]
